1 **Colonization and diversification of aquatic insects on three Macaronesian**  
2 **archipelagos using 59 nuclear loci derived from a draft genome**

3 Sereina Rutschmann<sup>a,b,c,\*</sup>, Harald Detering<sup>a,b,c</sup>, Sabrina Simon<sup>d,e</sup>, David H. Funk<sup>f</sup>, Jean-Luc  
4 Gattolliat<sup>g</sup>, Samantha J. Hughes<sup>h</sup>, Pedro M. Raposeiro<sup>i</sup>, Rob DeSalle<sup>4d</sup>, Michel Sartori<sup>g</sup>, and  
5 Michael T. Monaghan<sup>a,b</sup>

6 *<sup>a</sup>Leibniz-Institute of Freshwater Ecology and Inland Fisheries (IGB), Müggelseedamm 301,*  
7 *12587 Berlin, Germany*

8 *<sup>b</sup>Berlin Center for Genomics in Biodiversity Research, Königin-Luise-Straße 6-8, 14195*  
9 *Berlin, Germany*

10 *<sup>c</sup>Department of Biochemistry, Genetics and Immunology, University of Vigo, 36310 Vigo,*  
11 *Spain*

12 *<sup>d</sup>Sackler Institute for Comparative Genomics, American Museum of Natural History, Central*  
13 *Park West and 79<sup>th</sup> St., New York, NY 10024, USA*

14 *<sup>e</sup>Biosystematics Group, Wageningen University, Droevendaalsesteeg 1, 6708 PB*  
15 *Wageningen, The Netherlands*

16 *<sup>f</sup>Stroud Water Research Center, Avondale, Pennsylvania 19311, USA*

17 *<sup>g</sup>Musée cantonal de zoologie, Palais de Rumine, Place de la Riponne 6, 1014 Lausanne,*  
18 *Switzerland*

19 *<sup>h</sup>Centro de Investigação e de Tecnologias Agro-Ambientais e Biológicas (CITAB),*  
20 *Universidade de Trás-os-Montes e Alto Douro, Quinta de Prados, Apartado 1013, 5001-801*  
21 *Vila Real, Portugal*

22 *<sup>i</sup>Research Centre in Biodiversity and Genetic Resources (CIBIO)-Açores and the Biology*  
23 *Department, University of Azores, Rua Mãe de Deus 13A, 9501-855 Ponta Delgada, Portugal*

24 **\*Correspondence:** Sereina Rutschmann, Phylogenomics Lab, Department of Biochemistry,  
25 Genetics and Immunology, University of Vigo, 36310 Vigo, Spain, E-mail:  
26 [sereina.rutschmann@gmail.com](mailto:sereina.rutschmann@gmail.com)

27 **Abstract**

28 The study of processes driving diversification requires a fully sampled and well resolved  
29 phylogeny. Multilocus approaches to the study of recent diversification provide a powerful  
30 means to study the evolutionary process, but their application remains restricted because  
31 multiple unlinked loci with suitable variation for phylogenetic or coalescent analysis are not  
32 available for most non-model taxa. Here we identify novel, putative single-copy nuclear DNA  
33 (nDNA) phylogenetic markers to study the colonization and diversification of an aquatic  
34 insect species complex, *Cloeon dipterum* L. 1761 (Ephemeroptera: Baetidae), in Macaronesia.  
35 Whole-genome sequencing data from one member of the species complex were used to  
36 identify 59 nDNA loci (32,213 base pairs), followed by Sanger sequencing of 29 individuals  
37 sampled from 13 islands of three Macaronesian archipelagos. Multispecies coalescent  
38 analyses established six putative species. Three island species formed a monophyletic clade,  
39 with one species occurring on the Azores, Europe and North America. Ancestral state  
40 reconstruction indicated at least two colonization events from the mainland (Canaries,  
41 Azores) and one within the archipelago (between Madeira and the Canaries). Using random  
42 subsets of the 59 loci showed a positive linear relationship between number of loci and node  
43 support. In contrast, node support in the multispecies coalescent tree was negatively  
44 correlated with mean number of phylogenetically informative sites per locus, suggesting a  
45 complex relationship between tree resolution and marker variability. Our approach highlights  
46 the value of combining coalescent-based phylogeography, species delimitation, and  
47 phylogenetic reconstruction to resolve recent diversification events in an archipelago species  
48 complex.

49 **Keywords:** *Baetidae, island radiation, multispecies coalescent, phylogeny, phylogeography*

## 50 **1. Introduction**

51 Any inference about the ecological and evolutionary processes driving diversification  
52 requires a well sampled and fully resolved phylogeny upon which traits can be mapped.  
53 Molecular phylogenetic studies historically have been limited to a small number of loci. The  
54 majority of studies are based largely on mitochondrial DNA (mtDNA) loci (Avice et al.,  
55 2000; Garrick et al., 2015) which have the benefit of small population size and high levels of  
56 polymorphism but suffer from several characteristics that can limit their suitability to  
57 reconstruct the evolutionary process. These include an inability to detect processes that  
58 confound gene trees and species trees such as hybridization and introgression, the inference of  
59 oversimplified or unresolved evolutionary relationships based on their matrilineal history,  
60 underestimated genetic diversity (Zhang and Hewitt 2003), and overestimation of divergence  
61 times (Zheng et al., 2011). Another major drawback is the presence of mtDNA genes that  
62 have been transposed to the nuclear genome, forming nuclear mitochondrial DNA (Numt;  
63 Lopez et al., 1994) which may appear homologous but give very different evolutionary  
64 signals from those of the real mtDNA. Phylogenetics has begun to benefit from more  
65 widespread use of single-copy nuclear DNA (nDNA) loci, and several recent studies have  
66 applied greater numbers of nDNA loci with success at the species (e.g. *Ambystoma tigrinum*  
67 (O'Neill et al., 2013); *Triturus cristatus* (Wielstra et al., 2014)), genus (e.g. *Takydromus*  
68 (Tseng et al., 2014); *Heliconius* (Kozak et al., 2015)), and higher taxonomic levels (e.g.  
69 Plethodontidae (Shen et al., 2016)).

70 The phylogenetic resolution of closely related taxa enables crucial insights in studies of  
71 evolution. In particular, the investigation of recent or ongoing species radiations helps to  
72 explain how components such as adaptation and hybridization are involved in the  
73 diversification process (e.g. Monaghan et al., 2006; Morvan et al., 2013; Giarla and Esselstyn  
74 2015; Toussaint et al., 2015). A number of model systems in evolutionary biology come from

75 closely related species groups that have diversified in island archipelagos (Schluter 2000;  
76 Gillespie and Roderick 2002, and references therein). Examples include Darwin's finches  
77 (Grant and Grant 2008), Anolis lizards (Losos and Ricklefs 2009), or Hawaiian spiders  
78 (Gillespie et al., 1994). While a robust phylogeny is needed to study diversification and  
79 adaptation in such groups, phylogenetic analysis of close relatives can be problematic.  
80 Discordance between gene trees and species trees is more likely when speciation is recent and  
81 the effective population size of the ancestral population is large relative to the age of the  
82 species (Kubatko and Degnan 2007; Degnan et al., 2012). This discordance can arise through  
83 hybridization, gene duplication and loss, and incomplete lineage sorting (Maddison 1997;  
84 Degnan and Rosenberg 2009; Knowles and Kubatko 2010; Nakhleh 2013). Increasing arrays  
85 of methods exist for examining multilocus data that account for these processes (Rannala and  
86 Yang 2003; Edwards 2009; Heled and Drummond 2010; Knowles and Kubatko 2010).  
87 Unfortunately, the appropriate data for these analyses can be lacking because it is difficult to  
88 generate sequence data for a sufficient number of suitable nDNA loci from non-model  
89 systems. Most nDNA loci exhibit low levels of polymorphism and therefore many loci are  
90 needed, whereas identification of novel nDNA loci that are suitable as phylogenetic markers  
91 is generally not straightforward. Here we use a whole-genome draft of a non-model species to  
92 develop nDNA markers suitable for phylogenetic reconstruction.

93 Macaronesia consists of four archipelagos (Azores, Madeira, Canary Islands, and Cape  
94 Verde) whose flora and fauna have been used in several studies as model systems for  
95 evolutionary research. Their distances to the adjacent continental mainland vary from 110 km  
96 (Fuerteventura in Canary Islands to Morocco) to more than 2000 km (Flores in the Azores to  
97 Portugal). Several colonization pathways have been identified (Juan et al., 2000; Emerson  
98 2002; Emerson and Kolm 2005), including a single colonization event followed by stepping-  
99 stone dispersal (Juan et al., 1997; Emerson and Oromi 2005; Illera et al., 2007; Arnedo et al.,

100 2008; Dimitrov et al., 2008), or multiple independent colonization events within the Canary  
101 Islands (Nogales et al., 1998; Ribera et al., 2003a; Díaz-Pérez et al., 2012; Rutschmann et al.,  
102 2014; Gohli et al., 2015; Stervander et al., 2015; Faria et al., 2016). While much research has  
103 been carried out on island evolution and endemism of terrestrial organisms, comparatively  
104 limited information exists for aquatic invertebrates (e.g. Stauder 1995; Drotz 2003; Ribera et  
105 al., 2003b, 2003c; Jordal and Hewitt 2004; Hughes and Malmqvist 2005). This is a large  
106 discrepancy considering that aquatic insects contribute a disproportionately large amount of  
107 global biodiversity despite the relatively small extent of their habitat (Dijkstra et al., 2014).

108 Mayflies are well suited for phylogeographic studies considering their ancient origins (300  
109 million years (Ma)), global distribution, and limited dispersal ability due to the strict water  
110 habitat fidelity of larvae and very short life of the winged adults (Monaghan et al., 2005;  
111 Barber-James et al., 2008). Several studies have pointed out their unusual potential for  
112 dispersion, reporting mayfly species on remote islands such as the Azores (Brinck and  
113 Scherer 1961; Raposeiro et al., 2012), trans-oceanic dispersal between Madagascar and  
114 continental Africa (Monaghan et al., 2005; Vuataz et al., 2013), and recent colonization  
115 processes of several lineages on the Canary Islands and Madeira  $\approx$  14 Ma, including a close  
116 link to the African mainland (Rutschmann et al., 2014).

117 The species complex of *Cloeon dipterum* L. 1761 is one of the most common and abundant  
118 species of freshwater insects in European standing water. The taxonomic classification and  
119 phylogenetic relationships within the *C. dipterum* s.l. species complex, including its  
120 complicated synonymy, remain largely unknown. The species complex belongs to the  
121 subgenus *Cloeon* Leach, 1815. In Europe, *Cloeon* consists of *C. dipterum*, two other currently  
122 recognized species (*C. peregrinator* Gattolliat and Sartori, 2008, and *C. saharensense* Soldán and  
123 Thomas, 1983), and three species with unclear status (*species inquirenda*; *C. cognatum*  
124 Stephens, 1836, *C. inscriptum* Bengtsson, 1914, and *C. rabaudi* Verrier, 1949) that are often

125 considered to be synonyms of *C. dipterum*. Its distribution ranges from North America, across  
126 Europe to Northern Asia (excluding China), making it one of the largest known distributions  
127 among mayflies (Bauernfeind and Soldán 2012, and references therein). Larvae are found in a  
128 variety of aquatic habitats, including natural standing or slow-flowing waters, brackish water,  
129 intermittent watercourses, and artificial biotopes across a wide range of climatic zones  
130 (Bauernfeind and Soldán 2012, and references therein).

131 For this study we used a draft genome sequence of *Cloeon* to develop 59 nDNA loci  
132 suitable for phylogenetic reconstruction of closely related members of the *C. dipterum* s.l.  
133 species complex of mayflies. We identified target genes and designed primer pairs for them.  
134 Standard PCR and Sanger sequencing were used to generate sequences. We then applied  
135 Bayesian phylogenetic inference using concatenated sequence alignments and multispecies-  
136 coalescent approaches to delineate species, examine their colonization from the mainland, and  
137 understand their diversification throughout Atlantic oceanic islands (Fig. 1, Azores, Madeira,  
138 and Canary Islands). Additionally, we quantitatively examined the effect of increasing  
139 numbers of nDNA loci on tree resolution. Our analyses show how marker development can  
140 proceed efficiently from draft whole genomes and that large numbers of nDNA loci can  
141 produce fully resolved trees in closely related taxa, revealing the evolution and diversification  
142 of the geographically widespread *C. dipterum* s.l. species complex. The disentangled  
143 colonization routes of the three species occurring on the Macaronesian Islands highlight trans-  
144 oceanic dispersal abilities of aquatic insects as an important driver of allopatric speciation,  
145 including sympatric occurring sister-species on the islands and the mainland.

## 146 **2. Material and methods**

### 147 ***2.1 Development of nuclear DNA loci***

148 To develop a set of nuclear loci we sequenced a newly created whole-genome library of *C.*  
149 *dipterum* (see also Rutschmann et al., accepted). Libraries were generated from laboratory-  
150 reared subimagos of *C. dipterum* specimens (full siblings). DNA was extracted from pooled  
151 specimens (5-20) after removing eyes and wings using the Invisorb® Spin Tissue Mini kit  
152 (STRATEC, Berlin, Germany). Extracted DNA was precipitated using Isopropanol and  
153 pooled in order to obtain higher DNA yield. We prepared one 454 shotgun and one 454  
154 paired-end library according to the manufacturer's guidelines (Rapid Library Preparation  
155 Method Manual, GS FLX+ Series - XL+, May 2011; Paired End Library Preparation Method  
156 Manual – 20 kb and 8 kb Span, GS FLX Titanium Series, October 2009). The fragments were  
157 amplified with an emulsion PCR (emPCR Method Manual - Lib-L SV, GS FLX Titanium  
158 Series, October 2009; Rev. Jan 2010). Four lanes per library were sequenced on a Roche  
159 (454) GS FLX machine). The sequence reads were trimmed and *de novo* assembled using  
160 NEWBLER v. 2.5.3 (454 Life Sciences Corporation) under the default settings for large  
161 datasets. We made two different assemblies, one with the reads from the shotgun library and  
162 one with the reads from both shotgun and paired-end libraries. The newly sequenced draft  
163 whole genome was combined with 4,197 expressed sequence tag (EST) sequences from  
164 *Baetis* sp. (GenBank Acc. no. FN198828–FN203024). *Cloeon* and *Baetis* belong to the  
165 Baetidae subfamilies Cloeoninae and Baetinae. Primer pairs were designed in the conserved  
166 regions of orthologous sequences from included taxa. The above analysis procedures have  
167 since been incorporated into the DISCOMARK pipeline for marker discovery and primer design  
168 (Rutschmann at al., accepted; see Supplementary File 2).

## 169 **2.2 Taxon sampling and DNA extraction**

170 We sampled individuals of the *C. dipterum* s.l. species complex from larval aquatic  
171 habitats at 38 sampling sites on 13 islands including the Azorean archipelago, the Canary  
172 Islands, Madeira (Fig. 1), and 32 sampling sites on the European and North American

173 mainland (Supplementary Tables 1 and 2). All samples were preserved in 99% ethanol in the  
174 field and stored at 4°C until analysis. DNA was extracted from 107 individuals using  
175 NucleoSpin® 96 tissue kits (Macherey-Nagel, Düren, Germany). Our analysis included  
176 multiple populations of all currently recognized taxa (based on both morphological and  
177 molecular data) on the islands (Brinck and Scherer 1961; Gattolliat et al., 2008; Rutschmann  
178 et al., 2014).

### 179 ***2.3 PCR amplification, sequence alignment, and sequence heterogeneity***

180 We sequenced 60 loci for the study: the mtDNA barcoding gene (*cox1*) and 59 newly  
181 developed nDNA loci. The *cox1* locus was amplified and sequenced using the procedure  
182 described by Rutschmann et al. (2014). Based on a general mixed Yule-coalescent (gmyc)  
183 model analysis (Fujisawa and Barraclough 2013) of *cox1*, we selected a representative set of  
184 29 individuals for which we obtained nDNA sequences, using the 59 newly designed primer  
185 pairs (Supplementary Table 3). Nuclear loci were amplified using standard polymerase chain  
186 reaction (PCR) protocols with an annealing temperature of 55°C. The PCR products were  
187 custom purified and sequenced at Beckman Coulter Genomics (Essex, UK) or Macrogen  
188 (Amsterdam, The Netherlands). Forward and reverse sequences were assembled and edited  
189 using GENEIOUS R7 v.7.1.3 (Biomatters Ltd.). Length variation (i.e. heterozygous indels) was  
190 decoded using CODONCODE ALIGNER v.3.5.6 (CodonCode Corporation, Centerville MA,  
191 USA). Additionally, we included previously published sequences from four individuals of 6  
192 nDNA loci (KU971838-KU971840, KU971851, KU971919-KU971921, KU971933,  
193 KU972490-KU972492, KU972503, KU972568-KU972570, KU972583, KU972653-  
194 KU972654, KU972666, KU973060-KU973062, KU973074).

195 Multiple sequence alignments were made for each locus using MAFFT v.7.050b (L-INS-I  
196 algorithm with default settings; Katoh and Standley 2013). The predicted orthologous  
197 sequences of *Baetis* sp. were used to infer the correct exon-intron splicing boundaries



198 (canonical and non-canonical splice site pairs) of each alignment. Exon-intron boundaries of  
199 locus 411912 could not be fully reconstructed and thus we used the exon sequence predicted  
200 from tblastx searches for subsequent analyses. Locus alignments were split into coding and  
201 non-coding parts using a custom script  
202 ([https://github.com/srutschmann/python\\_scripts/blob/master/extract\\_introns.py](https://github.com/srutschmann/python_scripts/blob/master/extract_introns.py)). All coding  
203 alignments were checked for indels and stop codons using MESQUITE v.2.75 (Maddison and  
204 Maddison 2011). Genotypes of the coding alignments were phased using the probabilistic  
205 Bayesian algorithm implemented in PHASE v.2.1.1 (Stephens et al., 2001; Stephens and  
206 Donnelly 2003) with a cutoff value of 0.6 (Harrigan et al., 2008; Garrick et al., 2010).  
207 Multiple runs were performed for each alignment and phase calls checked for consistency.  
208 Input and output files were formatted using the scripts from SEQPHASE (Flot 2010).  
209 Heterozygous sites that could not be resolved were coded using ambiguity codes for  
210 subsequent sequence analyses. All alignments were re-aligned after phasing with MAFFT.  
211 We excluded introns for the haplotype phasing because the noncoding alignments contained  
212 many gaps and missing data and thus the results of the sequence phasing were not  
213 satisfactory.

214 For the subsequent analyses, we prepared three alignment sets (Table 1), whereby we used  
215 all nDNA sequences (all\_data), all coding genotypes (exon\_all\_data) and all coding  
216 haplotypes (exonhap\_all\_data). Because data matrices were not 100% complete (see 3.1.  
217 Development of nuclear DNA loci), we made a second set of matrices that were 100%  
218 complete using only the 17 loci that were sequenced for all 29 individuals (complete\_matrix,  
219 exon\_complete\_matrix, exonhap\_complete\_matrix). The most appropriate substitution model  
220 for each locus was determined according to Bayesian Information Criterion in the program  
221 JMODELTEST v.2.1 (Guindon and Gascuel 2003; Darriba et al., 2012) (Supplementary Table  
222 3).

223 To investigate the heterogeneity among the newly developed loci, we reconstructed  
224 reticulation-free haplotype genealogies based on Fitch distances (Fitch 1970), using the  
225 program FITCHI (Matschiner 2015). We used the exonhap\_all\_data matrix and calculated a  
226 gene tree for each locus using RAxML v.8 (Stamatakis 2014) under the GTRCAT model with  
227 1,000 bootstrap replicates using the rapid bootstrap algorithm. The number of variable sites,  
228 informative sites, and Tajima's D for each locus was assessed using the package DENDROPY  
229 (Sukumaran and Holder 2010;  
230 [https://github.com/srutschmann/python\\_scripts/blob/master/alignment\\_stats.py](https://github.com/srutschmann/python_scripts/blob/master/alignment_stats.py)) and a custom  
231 script.

#### 232 ***2.4 Species assignment and population structure analysis***

233 Most analyses that use phylogenetic or multilocus species tree approaches require *a priori*  
234 species assignment. Because of the partly unknown and largely incomplete taxonomy of the  
235 group, we used two approaches to first assign the 29 *C. dipterum* individuals to putative  
236 species: the gmyc approach (Fujisawa and Barraclough 2013) and a Bayesian clustering  
237 algorithm to assign individuals to 'populations' (STRUCTURE, Pritchard et al., 2000; Falush  
238 et al., 2003). The gmyc approach was carried out using *cox1* from 147 specimens that  
239 included all newly sequenced *Cloeon* individuals, published sequences that were available as  
240 of February 2016 (Supplementary Table 2), six newly sequenced individuals of *C. simile*  
241 Easton, 1870, and *Baetis rhodani* (GenBank Acc. no. KF438126) as an outgroup. The  
242 analysis followed that of Rutschmann et al., (2014) except that we used BEAST v.2.3.2  
243 (Bouckaert et al., 2014) and a 2-partition scheme in which the first two codon positions were  
244 modeled with HKY + I and the third codon position with HKY +  $\Gamma$ . For the Bayesian  
245 clustering approach we used the exon\_all\_data matrix. We assumed 1-10 genotypic clusters  
246 (K) and ran nine replicate analyses for each K, using  $1 \times 10^6$  MCMC generations with a burn-

247 in of 10%. All individuals were assigned probabilistically without *a priori* knowledge to  
248 genetic clusters. We applied an admixture model with default settings (Supplementary File 3).

## 249 **2.5 Phylogenetic reconstruction**

250 We performed Bayesian phylogenetic reconstructions using all data (exon\_all\_data) and  
251 the complete matrix (exon\_complete\_matrix) using MRBAYES v.3.2.2 (Ronquist et al., 2012).  
252 As outgroup we used *Baetis* sp.. All individual locus alignments were concatenated using a  
253 custom Python script  
254 ([https://github.com/srutschmann/python\\_scripts/blob/master/fasta\\_concat.py](https://github.com/srutschmann/python_scripts/blob/master/fasta_concat.py)). For the tree  
255 reconstruction, we implemented the best-fit models for each locus, and unlinked the  
256 nucleotide frequencies, gamma distributions, substitution rates and the proportion of invariant  
257 sites across partitions. Two independent analyses of four MCMC chains, each with  $1 \times 10^7$   
258 generations and 25% burn-in were run.

259 To investigate how the number of loci analyzed affected node support values, we  
260 performed phylogenetic reconstructions based on concatenated sets of varying numbers of  
261 randomly selected loci (Supplementary Table 4). The analyses were performed and  
262 summarized as above. Linear regressions were used to predict the number of supported nodes  
263 for Bayesian posterior probability (PP)  $\geq 0.95$  and PP = 1 as a function of the number of loci  
264 used in the analysis. The Pearson correlation between the number of loci and number of  
265 supported nodes was calculated separately for both PP, using the stats package in R (R  
266 Development Core Team, 2016).

267 Species tree reconstructions were carried out under a multispecies coalescent framework  
268 (Drummond and Rambaut 2007; Heled and Drummond 2010) as implemented in the program  
269 \*BEAST v.2.1.3 (Bouckaert et al., 2014). All analyses were performed using exons, one  
270 analysis using all data and one using only the complete matrix, as above (Table 1;

271 exonhap\_all\_data, exonhap\_complete\_matrix). All individuals were *a priori* assigned to  
272 species based on the gmyc and Bayesian clustering analyses described above. In the Bayesian  
273 clustering analysis, one Russian individual was considered to be admixed based on PP  
274 assignment values > 0.05 for more than one cluster (Supplementary File 3, Supplementary  
275 Fig. 1, Supplementary Table 5). This individual was therefore excluded from further analysis.  
276 We used a relaxed uncorrelated lognormal clock for gene tree estimation at each locus and a  
277 Yule speciation-process prior. We conducted six independent runs of  $8 \times 10^8$  million  
278 generations each. Runs were combined in LOGCOMBINER v.2.1.3 (Bouckaert et al., 2014),  
279 whereby all parameters reached effective sample sizes (ESS) > 600. Maximum clade  
280 credibility trees for each species trees were obtained using TREEANNOTATOR v.2.1.3  
281 (Bouckaert et al., 2014). As for the concatenated phylogenetics (above), we examined how  
282 the number of loci included in the multilocus species tree analysis affected node support by  
283 re-running the analysis using subsets of differing numbers of randomly selected loci  
284 (Supplementary Table 4).

## 285 **2.5 Ancestral state reconstruction**

286 An ancestral state reconstruction approach was used to test the direction of the radiation  
287 (i.e. Continental to Island or Island to Continental). Ancestral range patterns of each  
288 individual were defined into four geographic areas: (1) a broadly defined Continental  
289 referring to the European and North American mainland, (2) Canary Islands, (3) Madeira, and  
290 (4) Azores. As input tree, we used the concatenated tree based on the exon\_all\_data inferred  
291 with MRBAYES. A chronogram was fit to the tree using the chronos function in the ape v.3.4  
292 (Paradis et al., 2004) package in R. Ancestral states were estimated under an equal-rates (ER)  
293 model using the function ace, and the scaled likelihoods of each ancestral state were  
294 calculated using the function lik.anc in ape v.3.4. A MCMC approach was used to sample  
295 character histories from their PP distribution generating 1,000 stochastic character maps with

296 the function `make.simmap` of the `phytools` v.0.4.98 (Revell 2012) package in R  
297 (Supplementary File 4).

### 298 **3. Results**

#### 299 ***3.1 Development of nuclear DNA loci***

300 Whole-genome sequencing resulted in 1,109,684 raw reads, including 651,306 reads for  
301 the shotgun library and 458,378 reads for the paired-end library, with an average large contig  
302 length of 1,187 and 736 bp, respectively (BioSample SAMN03202660, BioProject  
303 PRJNA268073, Sequence Read Archive SRP050093). All reads were assembled into 68,473  
304 contigs with an N50 of 1,116 bp. The reads of the shotgun library were assembled into 31,827  
305 contigs with an N50 of 1,260 bp. We detected 918 putative orthologous gene sequences for *C.*  
306 *dipterum* from the contigs derived from the shotgun library, 1,298 putative orthologous gene  
307 sequences from the contigs of the combined assembly, and 416 for *Baetis* sp. (Supplementary  
308 Table 6). We successfully designed primer pairs for 59 sequence alignments (Supplementary  
309 Table 3), mostly based on orthologous sequences from both taxa.

310 Total fragment length per sequenced locus ranged from 210 - 1,007 bp with a mean of 545  
311 bp. Exon sequence length ranged from 210 - 710 bp with a mean of 410 bp (Supplementary  
312 Table 3) (KF438124-KF438125, KU757080-KU757184, and KU971616-KU973191). The  
313 full data matrix of all 29 individuals and all 59 loci including exons and introns (`all_data`) was  
314 32,213 bp in length when concatenated and when introns were removed (`exon_all_data`) it  
315 was 24,168 bp (Table 1). All individuals were successfully sequenced for at least 44 loci, and  
316 the above matrices were >75% complete. The 100% complete matrix included 17 loci that  
317 were sequenced successfully for all 29 individuals. All heterozygous indels were located in  
318 the intron sequences. However, 100 heterozygous sites could not be resolved and remained  
319 in the exonhap alignments.

320 All haplotype genealogies showed clear structuring (Supplementary Fig. 2). For 33 loci,  
321 we found haplotypes shared between putative species. The number of variable sites per locus  
322 ranged from six to 65 (mean: 18.95). These values were lower than those reported above  
323 because ambiguous sites were not considered variable in the haplotype analysis. In the  
324 exon\_all\_data matrix, there was one SNP per every 21.62 nucleotides sequenced (i.e. total  
325 length per total number of variable sites). The loci included between six and 54 informative  
326 sites (mean: 16) and one to 26 ambiguous sites (mean: 8.4). Nucleotide diversity ranged from  
327 0.007 to 0.04 (mean: 0.017), and Tajima's D varied between -0.85 and 1.97 (mean: 0.29)  
328 (Supplementary Table 7).

### 329 **3.2 Species assignment and population structure**

330 There were 62 unique *cox1* haplotypes of *Cloeon* and the gmyc model was a significantly  
331 better fit to the data than the null ( $\chi^2 = 31.00$ ,  $p < 0.001$ ). There were seven putative species  
332 delineated within *C. dipterum* s.l. (Fig. 2a): One occurred only in Asia (South Korea) while  
333 the remaining six included three species with distributions that included the Macaronesian  
334 Islands (IS1- IS3) and three species only occurring on the European and North American  
335 continents (CT1- CT3). The population assignments from the Bayesian clustering analyses of  
336 nDNA (Supplementary File 3, Supplementary Fig. 1, and Supplementary Table 5) agreed  
337 completely with the results from the gmyc analysis. Among these six, one widespread species  
338 (IS1) was found on all Azorean islands, in Greece and Italy, and in North America, one on the  
339 Canary Islands and Madeira (IS2), and one only on four of the Canary Islands (IS3). The  
340 model recognized all seven *C. dipterum* gmyc species even when using the most conservative  
341 estimate (95% CI based on two log likelihood units: 16-19 gmyc species). The two *C.*  
342 *cognatum* specimens from the North American DNA barcoding project (Webb et al., 2012)  
343 had *cox1* haplotypes identical to our gmyc species IS1.

### 344 **3.3 Phylogenetic reconstruction**

345 Analyses based on both exon matrices (exon\_all\_data; exon\_complete\_matrix) recovered  
346 the same tree topology with strong node support, resolving each of the three species occurring  
347 on Macaronesia (IS1-IS3) as monophyletic and members of a monophyletic ‘Island clade’  
348 (Fig. 3a). The geographically widespread species IS1 was sister taxon to the two others.  
349 Species CT2 and CT3 were both monophyletic and sister group to the Island clade (Fig. 3a).  
350 All individuals in CT1 were monophyletic except for a single individual that was sister taxon  
351 to the entire *C. dipterum* s.l. lineage. There were 27 resolved ( $PP \geq 0.95$ ) nodes in the full  
352 matrix (all\_data) tree; the only unresolved node was between the two Azorean individuals  
353 (Fig. 3a). In contrast, the complete matrix tree contained only 19 resolved nodes, with lack of  
354 resolution most pronounced in IS2 (Supplementary Fig. 3).

355 All species tree phylogenies had identical topologies and these matched the Bayesian  
356 phylogenies (Figs. 2b, 3a) in that Island and Continental clade both were monophyletic, with  
357 IS1 sister taxon to IS2 + IS3, and with CT1 sister taxon to CT2 + CT3. Using the  
358 exon\_complete\_matrix, all nodes were highly supported ( $PP \geq 0.99$ ; Table 2). All individuals  
359 clustered into six species in the same way in both the multilocus nDNA tree and the single-  
360 locus (*cox1*) mtDNA tree ( $PP = 1$ ), but the relationships among the species were different.  
361 The mtDNA tree did not support the sister relationship of IS2 + IS3 or the monophyly of the  
362 Continental clade (Fig. 2a; Table 2).

363 There was a strong positive relationship ( $R^2 = 0.83$ ,  $p < 0.001$  for  $PP \geq 0.95$ , and  $R^2 = 0.75$ ,  
364  $p < 0.001$  for  $PP = 1$ ) between the number of loci employed and the number of nodes resolved  
365 for the concatenation approach (Fig. 3b). The relationship was less clear in the multispecies  
366 coalescent analysis, with node support in the species tree varying more widely with the  
367 number of loci employed. The highest overall support came from analysis of 17 and 40 loci,

368 although only the analysis using 20 loci failed to recover either node in the Macaronesian  
369 clade and resulted in no resolution other than continental monophyly (Fig. 2b, Table 2).

### 370 ***3.4 Ancestral state reconstruction***

371 The ancestral state reconstruction identified four nodes showing marginal states with less  
372 than 0.9 Bayesian PP for one character, including sister relationship between individual  
373 CH010\_SR21B07 and the remaining species, the ancestral node of IS2 + IS3 (Canary Islands  
374 and Madeira), and the nodes separating Madeiran from Canarian individuals within IS2. The  
375 Island clade had a continental origin, further a Canarian origin was estimated for IS2 + IS3.  
376 The clade IS2 was estimated to have an ancestral state of 0.59 for Madeira and 0.4 for the  
377 Canary Islands (Supplementary File 4).

## 378 **4. Discussion**

### 379 ***4.1 Number of loci for phylogenetics***

380 A recent study by O'Neill et al., (2013) examined how multilocus species tree inferences  
381 varied with differing number of loci. In their study, analysis based on the 20 and 30 most  
382 informative loci (using a parsimony criterion) resulted in high PPs, whereas node support  
383 values were lower and likelihoods failed to converge when less informative loci were added  
384 to the analysis. They concluded this was the result of the increasing number of parameters  
385 while adding loci with decreasing levels of information. Our results are not directly  
386 comparable to those of O'Neill et al. (2013) for the species tree reconstruction, because we  
387 did not explicitly order loci by parsimony-informative sites in our tests. Nonetheless, we  
388 found a strong negative correlation (Pearson  $R = -0.95$ ) between the mean number of  
389 informative sites per locus and mean node support in the coalescent species tree (data not  
390 shown). This suggests that the number of informative sites was not able to explain variation in  
391 support alone, and that multiple characteristics of individual loci play an important role in



392 whether or not analyses achieve convergence and tree resolution. For the concatenation  
393 approach, we found a positive linear correlation between number of loci and node support.  
394 This was despite the larger number of parameters. Simulations based on 200 to 300 loci  
395 showed that the divergence time estimation using 50 loci are robust (Shen et al., 2016). In our  
396 study we observed that the reduction in node support when using a reduced set of loci  
397 (exon\_complete\_matrix vs. exon\_all\_data, see section 2.3) primarily affected the most  
398 derived clade (IS2), which highlights the importance of large nDNA marker sets for the  
399 reconstruction of shallow phylogenies.

#### 400 **4.2 Species delineation**

401 The perfect agreement of the Bayesian clustering and mitochondrial *gmyc* approaches for  
402 *a priori* species delineation support the use of *cox1* as barcoding gene for the taxa studied  
403 (e.g. Lucentini et al., 2011; Pereira-da-Conceicao et al., 2012; Webb et al., 2012; Rutschmann  
404 et al., 2014). The distant clustering of one individual (CH010\_SR21B07) in the concatenated  
405 tree analyses might be explained by incomplete lineage sorting since the species tree  
406 inferences using \*BEAST did result in a clear clustering of CT1 with low frequency of  
407 different topology (Fig. 3a). Moreover, when incomplete lineage sorting is present, standard  
408 methods for estimating species trees, such as concatenation and consensus methods, can be  
409 statistically inconsistent (Degnan et al., 2009; Roch and Steel 2014), and produce highly  
410 supported but incorrect trees (Kubatko and Degnan 2007). The majority of gene trees could  
411 support an incorrect species tree if the phylogeny is in the anomaly zone (Degnan and  
412 Rosenberg 2006). However, here this does not seem to be the case, otherwise one would  
413 expect the concatenation and coalescent approach to support different topologies (Kubatko  
414 and Degnan 2007; Liu and Edwards 2009). The inferred haplotype networks illustrate the  
415 necessity of using several individuals per species. For example, the individuals of IS2 shared  
416 several haplotypes with other species, indicating incomplete lineage sorting between the

417 different species.. Originally, it was thought that \*BEAST analyses would be quite robust in  
418 the presence of gene flow while migration is problematic (Heled et al., 2013). However,  
419 Leaché et al., (2014) have shown that gene flow can alter species trees, ranging from  
420 decreasing PPs for low gene flow up to altering the species tree topology when high levels of  
421 gene flow occur.

#### 422 **4.3 Species diversity**

423 The use of nDNA and geographically extensive sampling uncovered a largely  
424 underestimated species diversity for *C. dipterum* s.l. species complex, supporting the  
425 existence of six geographically relevant species from our study (with a seventh in Asia).  
426 Recent evidence from the study of another mayfly species found fine-scale ecological  
427 differences among cryptic species detected with molecular methods (Macher et al., 2016),  
428 lending support to the ecological and evolutionary significance of these and other DNA-based  
429 findings. Another widespread species, *Baetis harrisoni*, was also found to consist of several  
430 cryptic species (Pereira-da-Conceicao et al., 2012). In light of the unusually broad ecological  
431 tolerance (among mayflies) observed for *C. dipterum*, we also conclude that the lineage  
432 clearly consists of multiple independent species, as has been recognized by morphological  
433 taxonomy for some of the members (e.g. *C. peregrinator*). All of our analyses grouped two  
434 specimens of *C. peregrinator* from Madeira with individuals from several Canary Islands into  
435 species IS2. Gattolliat et al., (2008) described *C. peregrinator* as an endemic Madeiran  
436 species based on morphological characters and support from mtDNA cytochrome-oxidase *b*  
437 sequences. At the time, there were no nDNA sequences of Canarian *C. dipterum* s.l.  
438 specimens available. Rutschmann et al., (2014) assigned all Madeiran *Cloeon* individuals to  
439 *C. peregrinator* for their mtDNA phylogeny, but the specimens were not included in their  
440 gmyc analysis because there were no *cox1* sequences. Based on our findings here, there is no  
441 endemic *Cloeon* species on Madeira.

442 The focus of our study was Macaronesia and therefore nDNA results are only applicable to  
443 these taxa, but the mtDNA gene tree provides evidence for broad cryptic diversity within the  
444 subfamily Cloeoninae. Although these are single-locus data and must therefore be considered  
445 preliminary, we note that the mtDNA and nDNA species delineation results were fully  
446 congruent. *Cloeon simile* included two geographically widespread European gmyc species,  
447 and *C. smaeleni* Lestage 1924 was two gmyc species, one with Saudi Arabian and one with  
448 Afrotropical distribution. The species *C. praetexum* was clearly distinct from all other  
449 examined European specimens, which was surprising because it is thought to belong to *C.*  
450 *simile* s.l.. The two specimens of *C. cognatum*, which is thought to be a junior synonym of *C.*  
451 *dipterum* by some authors, were nested within the IS1 clade. All of the above findings must  
452 be considered preliminary because they are based on mtDNA, although we note that mtDNA  
453 and nDNA markers agreed in all of the *Cloeon* species that were directly compared. Further  
454 studies on these taxa with additional molecular markers, using morphological characteristics,  
455 and including comparisons with previously described species that are now considered junior  
456 synonyms or *species inquirenda* would be a valuable complement to the work presented here.

#### 457 **4.4 Evolution, colonization, and diversification**

458 For the species occurring in the Macaronesian region, one species appeared widely  
459 distributed on all Canary Islands and Madeira (IS2), one species was found only on the  
460 western group of the Canarian islands (IS3), and one species was found on five islands of the  
461 Azores, in Italy, in Greece and in North America (IS1). The short branches and occurrence of  
462 shared haplotypes of individuals from IS1 support very recent or perhaps ongoing gene flow.  
463 Other studies have found evidence for recent or ongoing dispersal in *Cloeon* (e.g., Monaghan  
464 et al., 2005) including a recent introduction of African *Cloeon* to South America (*C. smaeleni*,  
465 Salles et al., 2014). This long-distance dispersal ability is probably at least partly related to  
466 their reproductive flexibility including ovivipary and their ability to survive in anthropogenic

467 habitats. Our ancestral state reconstruction indicated that IS2 may have first colonized  
468 Madeira and then the Canaries from west to east. Colonization routes between these two  
469 archipelagos have been suggested for several taxa (Emerson et al., 2000a; Emerson et al.,  
470 2000b; Trusty et al., 2005; Illera et al., 2007; Dimitrov et al., 2008; Amorim et al., 2012). IS3  
471 seems not to have reached La Palma and the two most eastern Canarian islands of  
472 Fuerteventura and Lanzarote. The dispersal of IS3 appears to have followed the progression  
473 rule, in which older islands are inhabited by older clades, which is further supported by  
474 stepping-stone dispersal along an east-western gradient.

475 Our data confirm at least three and possibly four independent colonization events of the  
476 islands studied, with a European origin for the Macaronesian *C. dipterum* s.l.; however, long  
477 branches between Continental clades and the Island clade suggest there may be missing  
478 intermediates. These may occur in the Iberian Peninsula or North Africa. Several studies have  
479 proposed a North African origin for both the Canarian and Madeiran fauna (Brunton and  
480 Hurst 1998; Kvist et al., 2005; Weingartner et al., 2006; Gohli et al., 2015; Stervander et al.,  
481 2015). The Continental clades are also distantly related to one another and the long branches  
482 within both clades, compared to the Island clades, suggest there may be additional European  
483 species that are not included here.

484 A strong effect of different habitat preferences between the two Canarian species, which  
485 might impact their colonization success, is evidenced. Although we recognize that our dataset  
486 was not quantitative, we observed that species IS3 generally occurred on islands with more  
487 potential habitats in comparison to IS2, which seems to have better dispersal abilities and  
488 might therefore be able to more successfully colonize islands with very little water  
489 occurrence. This pattern may be linked with the occurrence of suitable water habitats on the  
490 Canarian Islands, including the four islands of Gran Canaria, Tenerife, La Gomera, and La  
491 Palma, which all have permanent natural water sources, and the island of El Hierro where

492 several artificial standing water habitats exist due to mostly temperate climatic conditions,  
493 whereas there are only very few habitats on Fuerteventura and Lanzarote due to the arid  
494 climatic conditions. The effect of habitat use on species richness has been shown for aquatic  
495 beetles (Ribera et al., 2003c), whereby running water bodies contain more species than  
496 standing ones. This pattern also applies to the Macaronesian mayflies. The genus *Baetis*  
497 occurs in running waters and is species-rich, including eight island endemic species on five  
498 islands of Madeira and the Canary Islands (Rutschmann et al., 2014). In contrast, the genus  
499 *Cloeon* comprises three species none of which are restricted to a single island. The impact of  
500 agriculture and tourism on natural habitats (Malmqvist et al., 1995; Nilsson et al., 1998) has  
501 clearly threatened the occurrence of species living in lotic habitats (*Baetis canariensis* and *B.*  
502 *pseudorhodani*, Rutschmann et al., 2014), but it may have had less of an effect on *C.*  
503 *dipterum*. The recent records of mayflies from El Hierro indicate a recent anthropogenic  
504 import of the species, moreover because it is the youngest island of the Canarian archipelago  
505 and its remote geographical position.

506 Interestingly, there were eight sampling sites (out of 32 examined sites, i.e. 25%) in which  
507 both species IS2 and IS3 occurred sympatrically. Four of these localities were natural  
508 habitats. However, more work needs to be done to make quantitative assessments on species  
509 occurrence and local abundance of the two distinct species occurring on the same habitats. A  
510 wider geographic sampling, focusing on the specimens from the European mainland and  
511 North Africa will be needed to clarify the origin and distribution of the *C. dipterum* s.l.  
512 species complex. We expect to find more individuals from distinct geographic localities  
513 belonging to the species IS1, since this species seems to exhibit long distance trans-oceanic  
514 dispersal abilities.

515

## 516 **5. Conclusion**

517 Our aims were to delineate the species boundaries within the *C. dipterum* species complex  
518 and place these lineages within a phylogenetic framework, in order to better understand their  
519 evolution on the Macaronesian Islands. Robust phylogenetic reconstruction of such closely  
520 related species can be challenging, but is a necessary step in the understanding of  
521 evolutionary processes of diversification and adaptation. Most readily available nDNA loci  
522 (e.g. rRNA) do not exhibit suitable polymorphism, resulting in a large dependence on mtDNA  
523 for phylogenetics (Garrick et al., 2015). A distinct advantage of using multiple nDNA loci  
524 comes from the advent of multilocus species tree reconstruction methods. These are important  
525 tools in the reconstruction of relationships between close relatives, which is often intractable  
526 based on single-locus (i.e. mtDNA) data. The difficulty in developing large numbers of  
527 nDNA loci remains one of the primary reasons that there are few model systems available for  
528 detailed studies of speciation and diversification processes. This is particularly true for  
529 freshwater insects, despite their overwhelming contribution to global biodiversity (Dijkstra et  
530 al., 2014). Here we developed a large set of nDNA loci using draft whole-genome sequencing  
531 combined with sequences from a published EST library that was constructed using a different  
532 subfamily. All of the procedures we used have since been incorporated into a single analysis  
533 pipeline (Rutschmann et al., accepted). Our results show that even for taxa with very limited  
534 available genomic resources, it is possible to develop sets of nuclear loci that produce fully  
535 resolved and supported coalescent-based species trees and single-matrix phylogenetic trees.  
536 Using these results, we were able to infer species boundaries within the largely cryptic *C.*  
537 *dipterum* s.l. species complex and reconstruct the diversification and island colonization  
538 history of these species with confidence.

539

540

541 **Author contributions**

542 S.R., M.S. and M.T.M. conceived the study. S.R., H.D., D.H.F., J.-L.G., S.J.H., and P.M.R.,  
543 provided samples. S.R., H.D., S.S., and R.D. contributed analytical tools. S.R., and M.T.M  
544 performed and interpreted the analyses. S.R. and M.T.M wrote the manuscript. All authors  
545 provided comments and approved the final manuscript.

546 **Acknowledgements**

547 We are grateful to B. Ortiz Crespo, S. Mbedi, K. Preuß, and L. Wächter for laboratory work;  
548 D. Murányi, A. Wagner, A. Przhiboro, P. Manko, M. F. Geiger, K. Kurzrock, L.F. Pires Braz,  
549 K. C. Gritzalis, and M. Alp for field work; P. Rutschmann and the HPC Service of ZEDAT,  
550 Freie Universität Berlin for access to high-performance computing resources. We are greatly  
551 indebted to M. Báez for obtaining sampling permits for the Canary Islands and to the  
552 authorities who provided us with the collection permissions. We are very grateful to our  
553 research groups, especially to I. Lucas Lledó and M. Gamboa for their constructive comments  
554 on this work. This is publication number #### of the Berlin Center for Genomics in  
555 Biodiversity Research. This work was supported by the Leibniz Association (PAKT für  
556 Forschung und Innovation) project FREDIE (SAW-2011-ZFMK-3 to M.T.M.) and by a travel  
557 award from the Leibniz-Institute of Freshwater Ecology and Inland Fisheries to S.R..  
558 Individual support was provided by the Japan Society for the Promotion of Science (Long-  
559 Term Research Fellowship L15543 to M.T.M.), the Swiss National Science Foundation  
560 (Early PostDoc.Mobility fellowship P2SKP3\_158698 to S.R.), the European Investment  
561 Funds by FEDER/COMPETE/POCI – Operacional Competitiveness and Internationalisation  
562 Programme (POCI-01-0145-FEDER-006958 to S.J.H.), and the National Funds by FCT -  
563 Portuguese Foundation for Science and Technology (UID/AGR/04033/2013 to S.J.H. and  
564 SFRH/BPD/99461/2014 to P.M.R.).

565 **References**

- 566 Amorim, I.R., Emerson, B.C., Borges, P.A.V., Wayne, R.K., 2012. Phylogeography and  
567 molecular phylogeny of Macaronesian island *Tarphius* (Coleoptera: Zopheridae): why are  
568 there so few species in the Azores? *J. Biogeogr.* 39, 1583-1595.
- 569 Arnedo, M.A., Oromi, P., De Abreu, S.M., Ribera, C., 2008. Biogeographical and  
570 evolutionary patterns in the Macaronesian shield-backed katydid genus *Calliphona* Krauss,  
571 1892 (Orthoptera : Tettigoniidae) and allies as inferred from phylogenetic analyses of  
572 multiple mitochondrial genes. *Syst. Entom.* 33, 145-158.
- 573 Avise, J.C., Nelson, W.S., Bowen, B.W., Walker, D., 2000. Phylogeography of colonially  
574 nesting seabirds, with special reference to global matrilineal patterns in the sooty tern  
575 (*Sterna fuscata*). *Mol. Ecol.* 9, 1783-1792.
- 576 Barber-James, H.M., Gattolliat, J.-L., Sartori, M., Hubbard, M.D., 2008. Global diversity of  
577 mayflies (Ephemeroptera, Insecta) in freshwater. *Hydrobiologia* 595, 339-350.
- 578 Bauernfeind, E., Soldán, T. 2012. The Mayflies of Europe. Ollerup, Apollo Books.
- 579 Bouckaert, R., Heled, J., Kuhnert, D., Vaughan, T., Wu, C.H., Xie, D., Suchard, M.A.,  
580 Rambaut, A., Drummond, A.J., 2014. BEAST 2: a software platform for Bayesian  
581 evolutionary analysis. *PLoS Comp. Biol.* 10, e1003537.
- 582 Brinck, P., Scherer, E. 1961. On the Ephemeroptera of the Azoreas and Madeira. *Boletim do*  
583 *Museu Municipal do Funchal* 47, 55-66.
- 584 Brunton, C.F.A., Hurst, G.D.D., 1998. Mitochondrial DNA phylogeny of Brimstone  
585 butterflies (genus *Gonepteryx*) from the Canary Islands and Madeira. *Biol. J. Linn. Soc.*  
586 *Lond.* 63, 69-79.

- 587 Darriba, D., Taboada, G.L., Doallo, R., Posada, D., 2012. jModelTest 2: more models, new  
588 heuristics and parallel computing. *Nat. Methods* 9, 772.
- 589 Degnan, J.H., DeGiorgio, M., Bryant, D., Rosenberg, N.A., 2009. Properties of consensus  
590 methods for inferring species trees from gene trees. *Syst. Biol.* 58, 35-54.
- 591 Degnan, J.H., Rosenberg, N.A., 2006. Discordance of species trees with their most likely  
592 gene trees. *PLoS Genet.* 2, e68.
- 593 Degnan, J.H., Rosenberg, N.A., 2009. Gene tree discordance, phylogenetic inference and the  
594 multispecies coalescent. *Trends Ecol. Evol.* 24, 332-340.
- 595 Degnan, J.H., Rosenberg, N.A., Stadler, T., 2012. A characterization of the set of species  
596 trees that produce anomalous ranked gene trees. *IEEE/ACM Trans. Comput. Biol.*  
597 *Bioinform.* 9, 1558-1568.
- 598 Díaz-Pérez, A.J., Sequeira, M., Santos-Guerra, A., Catalán, P., 2012. Divergence and  
599 biogeography of the recently evolved Macaronesian red *Festuca* (Gramineae) species  
600 inferred from coalescence-based analyses. *Mol. Ecol.* 21, 1702-1726.
- 601 Dijkstra, K.D., Monaghan, M.T., Pauls, S.U., 2014. Freshwater biodiversity and aquatic  
602 insect diversification. *Annu. Rev. Entomol.* 59, 143-163.
- 603 Dimitrov, D., Arnedo, M.A., Ribera, C., 2008. Colonization and diversification of the spider  
604 genus *Pholcus* Walckenaer, 1805 (Araneae, Pholcidae) in the Macaronesian archipelagos:  
605 evidence for long-term occupancy yet rapid recent speciation. *Mol. Phylogenet. Evol.* 48,  
606 596-614.
- 607 Drotz, M.K., 2003. Speciation and mitochondrial DNA diversification of the diving beetles  
608 *Agabus bipustulatus* and *A. wollastoni* (Coleoptera, Dytiscidae) within Macaronesia. *Biol.*  
609 *J. Linn. Soc. Lond.* 79, 653-666.
- 610 Drummond, A.J., Rambaut, A., 2007. BEAST: Bayesian evolutionary analysis by sampling  
611 trees. *BMC Evol. Biol.* 7, 214.
- 612 Edwards, S.V., 2009. Is a new and general theory of molecular systematics emerging?  
613 *Evolution* 63, 1-19.
- 614 Emerson, B.C., 2002. Evolution on oceanic islands: molecular phylogenetic approaches to  
615 understanding pattern and process. *Mol. Ecol.* 11, 951-966.
- 616 Emerson, B.C., Kolm, N., 2005. Species diversity can drive speciation. *Nature* 434, 1015-  
617 1017.
- 618 Emerson, B.C., Oromí, P., 2005. Diversification of the forest beetle genus *Tarphius* on the  
619 Canary Islands, and the evolutionary origins of island endemics. *Evolution* 59, 586-598.
- 620 Emerson, B.C., Oromí, P., Godfrey, M.H., 2000a. Interpreting colonization of the *Calathus*  
621 (Coleoptera: Carabidae) on the Canary Islands and Madeira through the application of the  
622 parametric bootstrap. *Evolution* 54, 2081-2090.
- 623 Emerson, B.C., Oromí, P., Hewitt, G.M., 2000b. Tracking colonization and diversification of  
624 insect lineages on islands: mitochondrial DNA phylogeography of *Tarphius canariensis*  
625 (Coleoptera: Colydiidae) on the Canary Islands. *Proc. Biol. Sci.* 267, 2199-2205.
- 626 Falush, D., Stephens, M., Pritchard, J.K., 2003. Inference of population structure using  
627 multilocus genotype data: linked loci and correlated allele frequencies. *Genetics* 164,  
628 1567-1587.
- 629 Faria, C.M.A., Machado, A., Amorim, I.R., Gage, M.J.G., Borges, P.A.V., Emerson, B.C.,  
630 2016. Evidence for multiple founding lineages and genetic admixture in the evolution of  
631 species within an oceanic island weevil (Coleoptera, Curculionidae) super-radiation. *J.*  
632 *Biogeogr.* 43, 178-191.
- 633 Fitch, W.M., 1970. Distinguishing homologous from analogous proteins. *Syst. Zool.* 19, 99-  
634 113.
- 635 Flot, J.F., 2010. seqphase: a web tool for interconverting phase input/output files and fasta  
636 sequence alignments. *Mol. Ecol. Resour.* 10, 162-166.



- 637 Fujisawa, T., Barraclough, T.G., 2013. Delimiting species using single-locus data and the  
638 Generalized Mixed Yule Coalescent approach: a revised method and evaluation on  
639 simulated data sets. *Syst. Biol.* 62, 707-724.
- 640 Garrick, R.C., Bonatelli, I.A., Hyseni, C., Morales, A., Pelletier, T.A., Perez, M.F., Rice, E.,  
641 Satler, J.D., Symula, R.E., Thomé, M.T., Carstens, B.C., 2015. The evolution of  
642 phylogeographic data sets. *Mol. Ecol.* 24, 1164-1171.
- 643 Garrick, R.C., Sunnucks, P., Dyer, R.J., 2010. Nuclear gene phylogeography using PHASE:  
644 dealing with unresolved genotypes, lost alleles, and systematic bias in parameter  
645 estimation. *BMC Evol. Biol.* 10, 118.
- 646 Gattolliat, J.-L., Hughes, S.J., Monaghan, M.T., Sartori, M., 2008. Revision of Madeiran  
647 mayflies (Insecta, Ephemeroptera). *Zootaxa* 1957, 52-68.
- 648 Giarla, T.C., Esselstyn, J.A., 2015. The challenges of resolving a rapid, recent radiation:  
649 empirical and simulated phylogenomics of philippine shrews. *Syst. Biol.* 64, 727-740.
- 650 Gillespie, R.G., Croom, H.B., Palumbi, S.R., 1994. Multiple origins of a spider radiation in  
651 Hawaii. *Proc. Natl. Acad. Sci. U.S.A.* 91, 2290-2294.
- 652 Gillespie, R.G., Roderick, G.K., 2002. Arthropods on islands: colonization, speciation, and  
653 conservation. *Annu. Rev. Entomol.* 47, 595-632.
- 654 Gohli, J., Leder, E.H., Garcia-Del-Rey, E., Johannessen, L.E., Johnsen, A., Laskemoen, T.,  
655 Popp, M., Lifjeld, J.T., 2015. The evolutionary history of Afrocanarian blue tits inferred  
656 from genome wide SNPs. *Mol. Ecol.* 24, 180-191.
- 657 Grant, P., Grant, R., 2008. How and why species multiply: the radiation of Darwin's finches.  
658 New Jersey, Princeton University Press.
- 659 Guindon, S., Gascuel, O., 2003. A simple, fast, and accurate algorithm to estimate large  
660 phylogenies by maximum likelihood. *Syst. Biol.* 52, 696-704.
- 661 Harrigan, R.J., Mazza, M.E., Sorenson, M.D., 2008. Computation vs. cloning: evaluation of  
662 two methods for haplotype determination. *Mol. Ecol. Resour.* 8, 1239-1248.
- 663 Heled, J., Bryant, D., Drummond, A.J., 2013. Simulating gene trees under the multispecies  
664 coalescent and time-dependent migration. *BMC Evol. Biol.* 13, 44.
- 665 Heled, J., Drummond, A.J., 2010. Bayesian inference of species trees from multilocus data.  
666 *Mol. Biol. Evol.* 27, 570-580.
- 667 Hughes, S.J., Malmqvist, B., 2005. Atlantic Island freshwater ecosystems: challenges and  
668 considerations following the EU Water Framework Directive. *Hydrobiologia* 8, 289-297.
- 669 Illera, J.C., Emerson, B.C., Richardson, D.S., 2007. Population history of Berthelot's pipit:  
670 colonization, gene flow and morphological divergence in Macaronesia. *Mol. Ecol.* 16,  
671 4599-4612.
- 672 Jordal, B.H., Hewitt, G.M., 2004. The origin and radiation of Macaronesian beetles breeding  
673 in Euphorbia: the relative importance of multiple data partitions and population sampling.  
674 *Syst. Biol.* 53, 711-734.
- 675 Juan, C., Oromí, P., Hewitt, G.M., 1997. Molecular phylogeny of darkling beetles from the  
676 Canary Islands: comparison of inter island colonization patterns in two genera. *Biochem.*  
677 *Syst. Ecol.* 25, 121-130.
- 678 Juan, C., Emerson, B.C., Oromí, P., Hewitt, G.M., 2000. Colonization and diversification:  
679 towards a phylogeographic synthesis for the Canary Islands. *Trends Ecol. Evol.* 15, 104-  
680 109.
- 681 Katoh, K., Standley, D.M., 2013. MAFFT multiple sequence alignment software version 7:  
682 improvements in performance and usability. *Mol. Biol. Evol.* 30, 772-780.
- 683 Knowles, L.L., Kubatko, L.S., 2010. Estimating Species Trees: Practical and Theoretical  
684 Aspects. Wiley-Blackwell.

- 685 Kozak, K.M., Wahlberg, N., Neild, A.F., Dasmahapatra, K.K., Mallet, J., Jiggins, C.D., 2015.  
686 Multilocus species trees show the recent adaptive radiation of the mimetic *Heliconius*  
687 butterflies. *Syst. Biol.* 64, 505-524.
- 688 Kubatko, L.S., Degnan, J.H., 2007. Inconsistency of phylogenetic estimates from  
689 concatenated data under coalescence. *Syst. Biol.* 56, 17-24.
- 690 Kvist, L., Broggi, J., Illera, J.C., Koivula, K., 2005. Colonisation and diversification of the  
691 blue tits (*Parus caeruleus teneriffae*-group) in the Canary Islands. *Mol. Phylogenet. Evol.*  
692 34, 501-511.
- 693 Leaché, A.D., Fujita, M.K., Minin, V.N., Bouckaert, R.R., 2014. Species delimitation using  
694 genome-wide SNP data. *Syst. Biol.* 63, 534-542.
- 695 Liu, L., Edwards, S.V., 2009. Phylogenetic analysis in the anomaly zone. *Syst. Biol.* 58, 452-  
696 460.
- 697 Lopez, J.V., Yuhki, N., Masuda, R., Modi, W., O'Brien, S.J., 1994. Numt, a recent transfer  
698 and tandem amplification of mitochondrial DNA to the nuclear genome of the domestic  
699 cat. *J. Mol. Evol.* 39, 174-190.
- 700 Losos, J.B., Ricklefs, R.E., 2009. Adaptation and diversification on islands. *Nature* 457, 830-  
701 836.
- 702 Lucentini, L., Reborá, M., Puletti, M.E., Gigliarelli, L., Fontaneto, D., Gaino, E., Panara, F.,  
703 2011. Geographical and seasonal evidence of cryptic diversity in the *Baetis rhodani*  
704 complex (Ephemeroptera, Baetidae) revealed by means of DNA taxonomy. *Hydrobiologia*  
705 673, 215-228.
- 706 Macher, J.N., Salis, R.K., Blakemore, K.S., Tollrian, R., Matthaei, C.D., Leese, F., 2016.  
707 Multiple-stressor effects on stream invertebrates: DNA barcoding reveals contrasting  
708 responses of cryptic mayfly species. *Ecol. Indic.* 61, 159-169.
- 709 Maddison, W.P., 1997. Gene trees in species trees. *Syst. Biol.* 46:523.
- 710 Maddison, W.P., Maddison, D.R., 2011. Mesquite: a modular system for evolutionary  
711 analysis. <http://mesquiteproject.org> (accessed 25.03. 2016).
- 712 Malmqvist, B., Nilsson, A.N., Báez, M., 1995. Tenerife's freshwater macroinvertebrates:  
713 status and threats (Canary Islands, Spain). *Aquat. Conserv.* 5, 1-24.
- 714 Matschiner, M., 2015. Fitchi: Haplotype genealogy graphs based on the Fitch algorithm.  
715 *Bioinformatics* 32, 1250-1252.
- 716 Monaghan, M.T., Balke, M.M., Pons, J.J., Vogler, A.P., 2006. Beyond barcodes: complex  
717 DNA taxonomy of a South Pacific Island radiation. *Proc. Biol. Sci.* 273, 887-893.
- 718 Monaghan, M.T., Gattolliat, J.L., Sartori, M., Elouard, J.M., James, H., Derleth, P., Glaizot,  
719 O., de Moor, F., Vogler, A.P., 2005. Trans-oceanic and endemic origins of the small  
720 minnow mayflies (Ephemeroptera, Baetidae) of Madagascar. *Proc. Biol. Sci.* 272, 1829-  
721 1836.
- 722 Morvan, C., Malard, F., Paradis, E., Lefebure, T., Konecny-Dupre, L., Douady, C.J., 2013.  
723 Timetree of Aselloidea reveals species diversification dynamics in groundwater. *Syst. Biol.*  
724 62, 512-522.
- 725 Nilsson, A.N., Malmqvist, B., Báez, M., Blackburn, J.H., Armitage, P.D., 1998. Stream  
726 insects and gastropods in the island of Gran Canaria (Spain). *Ann. Limnol.-Int. J. Limn.* 34,  
727 413-435.
- 728 Nogales, M., Delgado, J.D., Medina, F.M., 1998. Shrikes, lizards and *Lycium intricatum*  
729 (Solanaceae) fruits: a case of indirect seed dispersal on an oceanic island (Alegranza,  
730 Canary Islands). *J. Ecol.* 86, 866-871.
- 731 O'Neill, E.M., Schwartz, R., Bullock, C.T., Williams, J.S., Shaffer, H.B., Aguilar-Miguel, X.,  
732 Parra-Olea, G., Weisrock, D.W., 2013. Parallel tagged amplicon sequencing reveals major  
733 lineages and phylogenetic structure in the North American tiger salamander (*Ambystoma*  
734 *tigrinum*) species complex. *Mol. Ecol.* 22, 111-129.

- 735 Paradis, E., Claude, J., Strimmer, K., 2004. APE: Analyses of Phylogenetics and Evolution in  
736 R language. *Bioinformatics* 20, 289-290.
- 737 Pereira-da-Conceicao, L.L., Price, B.W., Barber-James, H.M., Barker, N.P., de Moor, F.C.,  
738 Villet, M.H., 2012. Cryptic variation in an ecological indicator organism: mitochondrial  
739 and nuclear DNA sequence data confirm distinct lineages of *Baetis harrisoni* Barnard  
740 (Ephemeroptera: Baetidae) in southern Africa. *BMC Evol. Biol.* 12, 26.
- 741 Pritchard, J.K., Stephens, M., Donnelly, P., 2000. Inference of population structure using  
742 multilocus genotype data. *Genetics* 155, 945-959.
- 743 R Core Team. 2016. R: A Language and Environment for Statistical Computing. R  
744 Foundation for Statistical Computing, Vienna, Austria. <https://www.R-project.org> (accessed  
745 26.03.2016).
- 746 Rannala, B., Yang, Z., 2003. Bayes estimation of species divergence times and ancestral  
747 population sizes using DNA sequences from multiple loci. *Genetics* 164, 1645-1656.
- 748 Raposeiro, P.M., Cruz, A.M., Hughes, S.J., Costa, A.C., 2012. Azorean freshwater  
749 invertebrates: Status, threats and biogeographic notes. *Limnetica* 31, 13-22.
- 750 Revell, L., 2012. phytools: An R package for phylogenetic comparative biology (and other  
751 things). *Methods Ecol. Evol.* 3, 217-223.
- 752 Ribera, I., Bilton, D.T., Balke, M., Hendrich, L., 2003a. Evolution, mitochondrial DNA  
753 phylogeny and systematic position of the Macaronesian endemic *Hydrotarsus* Falkenström  
754 (Coleoptera: Dytiscidae). *Syst. Entomol.* 28, 493-508.
- 755 Ribera, I., Bilton, D.T., Vogler, A.P., 2003b Mitochondrial DNA phylogeography and  
756 population history of *Meladema* diving beetles on the Atlantic Islands and in the  
757 Mediterranean basin (Coleoptera, Dytiscidae). *Mol. Ecol.* 12, 153-167.
- 758 Ribera, I., Foster, G.N., Vogler, A.P., 2003c. Does habitat use explain large scale species  
759 richness patterns of aquatic beetles in Europe? *Ecography* 26, 145-152.
- 760 Roch, S., Steel, M., 2014. Likelihood-based tree reconstruction on a concatenation of aligned  
761 sequence data sets can be statistically inconsistent. *Theor. Popul. Biol.* 100C, 56-62.
- 762 Ronquist, F., Teslenko, M., van der Mark, P., Ayres, D.L., Darling, A., Höhna, S., Larget, B.,  
763 Liu, L., Suchard, M.A., Huelsenbeck, J.P., 2012. MrBayes 3.2: efficient Bayesian  
764 phylogenetic inference and model choice across a large model space. *Syst. Biol.* 61, 539-  
765 542.
- 766 Rutschmann, S., Detering, H., Simon, S., Fredslund, J., Monaghan, M.T. (accepted)  
767 DiscoMark: Nuclear marker discovery from orthologous sequences using draft genome  
768 data. *Mol. Ecol. Resour.*
- 769 Rutschmann, S., Gattolliat, J.-L., Hughes, S.J., Sartori, M., Monaghan, M.T. 2014. Evolution  
770 and island endemism of morphologically cryptic *Baetis* and *Cloeon* species  
771 (Ephemeroptera, Baetidae) on the Canary Islands and Madeira. *Freshwater Biol.* 59, 2516-  
772 2527.
- 773 Salles, F.F., Gattolliat, J.-L., Angeli, K.B., De-Souza, M.R., Goncalves, I.C., Nessimian, J.L.,  
774 Sartori, M., 2014. Discovery of an alien species of mayfly in South America  
775 (Ephemeroptera). *ZooKeys* 1-16.
- 776 Schluter, D., 2000. *The Ecology of Adaptive Radiation*. New York, Oxford University Press.
- 777 Shen, X.X., Liang, D., Chen, M.Y., Mao, R.L., Wake, D.B., Zhang, P., 2016. Enlarged  
778 multilocus data set provides surprisingly younger time of origin for the Plethodontidae, the  
779 largest family of salamanders. *Syst. Biol.* 65, 66-81.
- 780 Soldán, T., Thomas, A., 1983. New a little-known species of mayflies (Ephemeroptera) from  
781 Algeria. *Acta Entomol. Bohemos.* 80, 356-376.
- 782 Stamatakis, A., 2014. RAxML version 8: a tool for phylogenetic analysis and post-analysis of  
783 large phylogenies. *Bioinformatics* 30, 1312-1313.

- 784 Stauder, A., 1995. Survey of the Madeiran limnological fauna and their zoogeographical  
785 distribution. *Boletim do Museu Municipal do Funchal* 4, 715-723.
- 786 Stephens, M., Donnelly, P., 2003. A comparison of bayesian methods for haplotype  
787 reconstruction from population genotype data. *Am. J. Hum. Genet.* 73, 1162-1169.
- 788 Stephens, M., Smith, N.J., Donnelly, P., 2001. A new statistical method for haplotype  
789 reconstruction from population data. *Am. J. Hum. Genet.* 68, 978-989.
- 790 Stervander, M., Illera, J.C., Kvist, L., Barbosa, P., Keehnen, N.P., Pruischer, P., Bensch, S.,  
791 Hansson, B., 2015. Disentangling the complex evolutionary history of the Western  
792 Palearctic blue tits (*Cyanistes* spp.) - phylogenomic analyses suggest radiation by multiple  
793 colonization events and subsequent isolation. *Mol. Ecol.* 24, 2477-2494.
- 794 Sukumaran, J., Holder, M.T., 2010. DendroPy: a Python library for phylogenetic computing.  
795 *Bioinformatics* 26, 1569-1571.
- 796 Toussaint, E.F., Condamine, F.L., Hawlitschek, O., Watts, C.H., Porch, N., Hendrich, L.,  
797 Balke, M., 2015. Unveiling the diversification dynamics of australasian predaceous diving  
798 beetles in the cenozoic. *Syst. Biol.* 64, 3-24.
- 799 Trusty, J.L., Olmstead, R.G., Santos-Guerra, A., Sa-Fontinha, S., Francisco-Ortega, J., 2005.  
800 Molecular phylogenetics of the Macaronesian-endemic genus *Bystropogon* (Lamiaceae):  
801 palaeo-islands, ecological shifts and interisland colonizations. *Mol. Ecol.* 14, 1177-1189.
- 802 Tseng, S.-P., Li, S.-H., Hsieh, C.-H., Wang, H.-Y., Lin, S.-M., 2014. Influence of gene flow  
803 on divergence dating - implications for the speciation history of *Takydromus* grass lizards.  
804 *Mol. Ecol.* 23, 4770-4784.
- 805 Vuataz, L., Sartori, M., Gattolliat, J.-L., Monaghan, M.T., 2013. Endemism and  
806 diversification in freshwater insects of Madagascar revealed by coalescent and  
807 phylogenetic analysis of museum and field collections. *Mol. Phylogenet. Evol.* 66, 979-  
808 991.
- 809 Webb, J.M., Jacobus, L.M., Funk, D.H., Zhou, X., Kondratieff, B., Geraci, C.J., DeWalt,  
810 R.E., Baird, D.J., Richard, B., Phillips, I., Herbert, P.D., 2012. A DNA barcode library for  
811 North American Ephemeroptera: progress and prospects. *PLoS ONE* 7, e38063.
- 812 Weingartner, E., Wahlberg, N., Nylin, S., 2006. Speciation in *Pararge* (Satyrinae:  
813 Nymphalidae) butterflies - North Africa is the source of ancestral populations of all  
814 *Pararge* species. *Syst. Entom.* 31, 621-632.
- 815 Wielstra, B., Duijm, E., Lagler, P., Lammers, Y., Meilink, W.R., Ziermann, J.M., Arntzen,  
816 J.W., 2014. Parallel tagged amplicon sequencing of transcriptome-based genetic markers  
817 for *Triturus* newts with the Ion Torrent next-generation sequencing platform. *Mol. Ecol.*  
818 *Resour.* 14, 1080-1089.
- 819 Zhang, D.-X., Hewitt, G.M., 2003. Nuclear DNA analyses in genetic studies of populations:  
820 practice, problems and prospects. *Mol. Ecol.* 12, 563-584.
- 821 Zheng, Y., Peng, R., Kuro-o, M., Zeng, X., 2011. Exploring patterns and extent of bias in  
822 estimating divergence time from mitochondrial DNA sequence data in a particular lineage:  
823 a case study of salamanders (order Caudata). *Mol. Biol. Evol.* 28, 2521-2535.

824 **Figures**

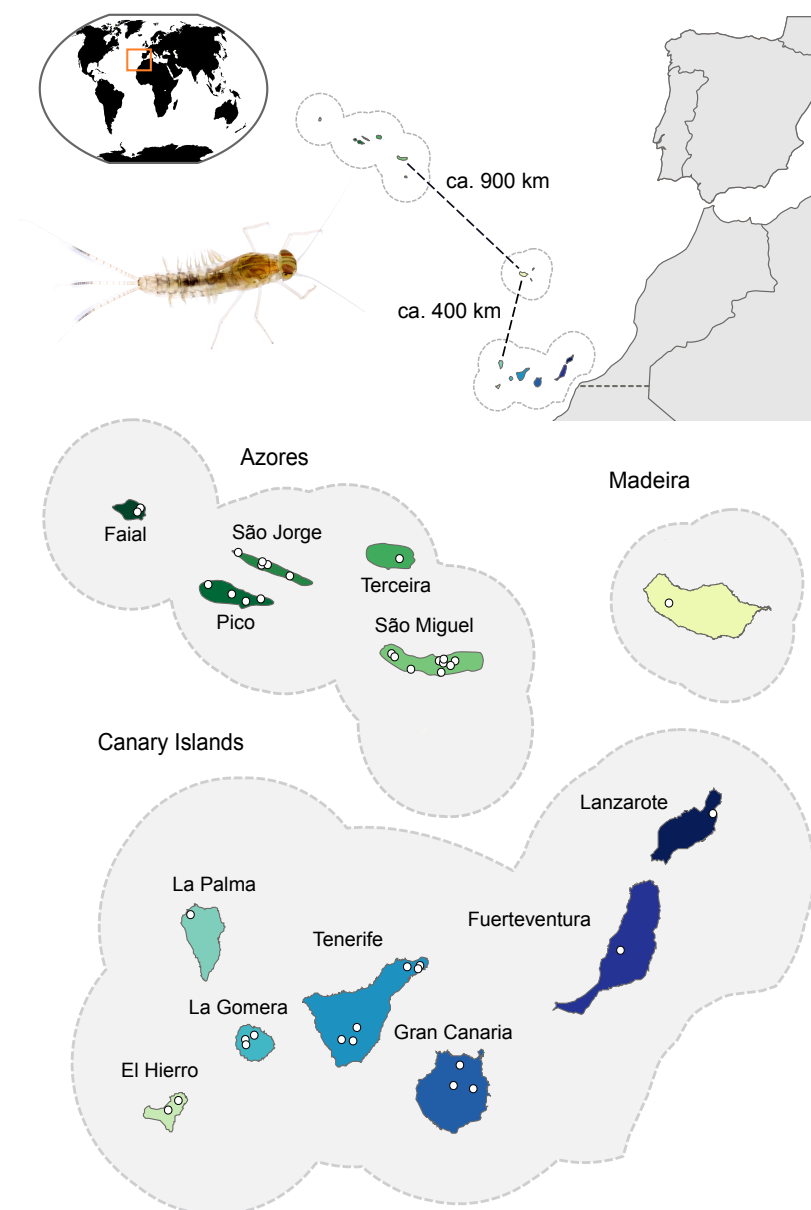

825

826 **Fig. 1.** Overview of the sampling localities on the Macaronesian region. The three  
827 archipelagos of the Azores, Madeira, and the Canary Islands are shown in detail, whereby the  
828 38 sampling sites are indicated by white dots. For the Azores and Madeira only islands with  
829 sampling sites are shown in the detailed view. Photo of *Cloeon dipterum* s.l. larvae by  
830 Amanda44 / CC BY 3.0.

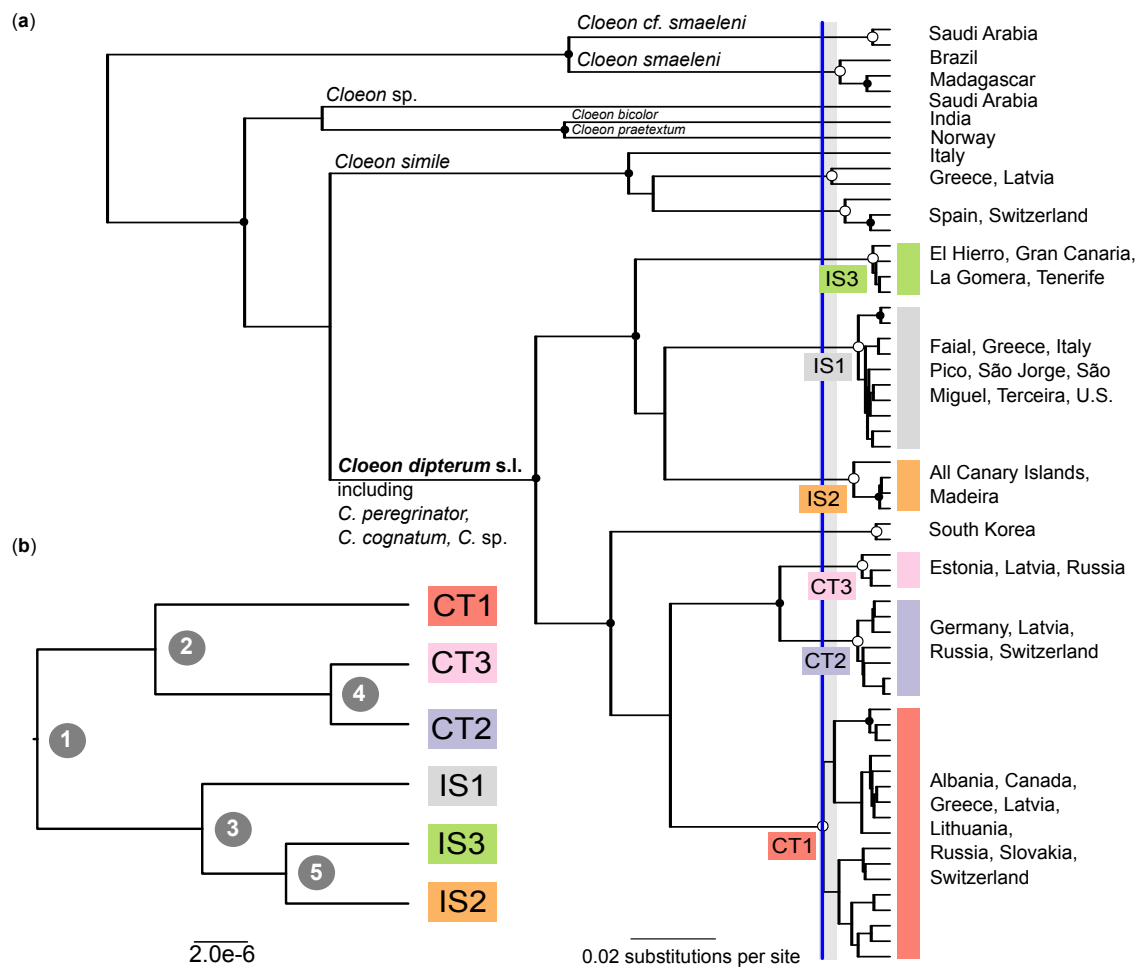

831

832 **Fig. 2.** Mitochondrial gene tree and nuclear species tree topology. Species delimitation from  
 833 (a) the general mixed Yule-coalescent (gmyc) approach based on mitochondrial data (single-  
 834 locus), and (b) the multispecies coalescent approach based on nuclear data (59 loci). (a), the  
 835 ultrametric mitochondrial *cox1* gene tree was used as input for the gmyc analysis of *Cloeon*  
 836 sp. All circles indicate well supported nodes (Bayesian posterior probability (PP)  $\geq 0.95$ ).  
 837 Open circles at subtending nodes indicate sequence clusters corresponding to single gmyc  
 838 species. Colors and alphanumeric codes indicate the six putative gmyc species. The outgroup  
 839 *Baetis rhodani* is not shown. The blue line indicates the point of maximum-likelihood fit of  
 840 the single-threshold gmyc model with 95% confidence interval in grey shading. Terminal  
 841 labels indicate sampling regions (Supplementary Table 1). (b), the species trees of *C.*  
 842 *dipterum* s.l. inferred by multispecies coalescent approach based on the exonhap\_all\_data  
 843 matrix. Posterior probabilities of the five nodes are indicated in Table 2.

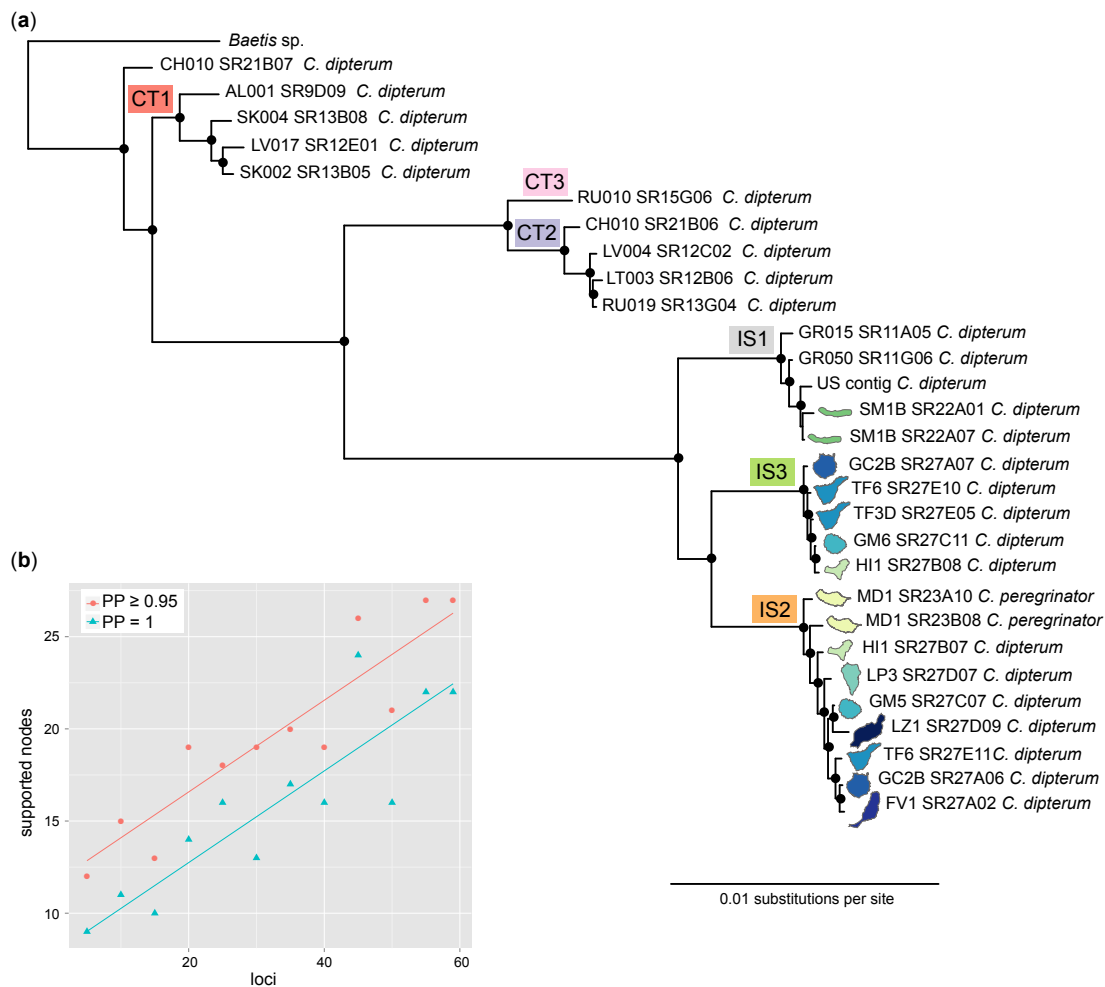

844

845 **Fig. 3.** Bayesian inference reconstruction of concatenation approach. **(a)**, the phylogenetic  
 846 relationships among *Cloeon dipterum* s.l. (including *C. peregrinator*) based on concatenated  
 847 exon\_all\_data matrix. Filled circles indicate well supported nodes (Bayesian posterior  
 848 probability (PP)  $\geq 0.95$ ). **(b)**, the positive linear relationship between number of loci analyzed  
 849 and number of supported nodes. Red circles represent nodes with PP  $\geq 0.95$  and blue triangles  
 850 represent nodes with PP = 1. Sets of loci are reported in Supplementary Table 4. The  $R^2$  for  
 851 PP  $\geq 0.95$  were 0.83 ( $p < 0.001$ ), and 0.75 ( $p < 0.001$ ) for PP = 1.

852

853 **Tables**

854 **Table 1.** Overview of seven sequence alignments, including one based on mitochondrial sequences and six based on nuclear sequences. The  
 855 mitochondrial sequence alignment including only the species group of *Cloeon dipterum* s.l. comprised 130 taxa with 148 variable sites. Matrices  
 856 containing all taxa and all loci were >75% complete; the matrices containing only loci sequenced for all taxa were 100% complete. Exon  
 857 matrices refer to exon sequence alignments and the exonhap matrices refer to exon haplotype sequences.

858

| Data Matrix             | Concatenated Length [bp] | Number of Taxa | Number of Loci | Number of Variable Sites | Description                                                    |
|-------------------------|--------------------------|----------------|----------------|--------------------------|----------------------------------------------------------------|
| mitochondrial           | 658                      | 148            | 1              | 240                      | All <i>cox1</i> sequences used for putative species assignment |
| all_data                | 32,213                   | 29             | 59             | 2,481                    | All taxa and loci; introns and exons                           |
| exon_all_data           | 24,168                   | 29             | 59             | 1,118                    | All taxa and loci; exons                                       |
| complete_matrix         | 8,565                    | 29             | 17             | 648                      | Only loci sequenced for all taxa; introns and exons            |
| exon_complete_matrix    | 6,485                    | 29             | 17             | 293                      | Only loci sequenced for all taxa; exons                        |
| exonhap_all_data        |                          | 29             | 59             | 1,390                    | All taxa and loci; haplotypes of exons                         |
| exonhap_complete_matrix |                          | 29             | 17             | 361                      | Only loci sequenced for all taxa; haplotypes of exons          |

859



860 **Table 2.** Node support values of the species tree analysis (Fig. 2b) using six different sets of  
861 loci (Supplementary Table 4). Support values are given as Bayesian posterior probability  
862 (PP).

863

| Number<br>of Loci | Node Support |                    |               |                |                | Mean |
|-------------------|--------------|--------------------|---------------|----------------|----------------|------|
|                   | All<br>(1)   | Continental<br>(2) | Island<br>(3) | CT2+CT3<br>(4) | IS2+IS3<br>(5) |      |
| 17                | 1.00         | 0.99               | 1.00          | 1.00           | 1.00           | 1.00 |
| 20                | 1.00         | 1.00               | -             | 1.00           | -              | 0.60 |
| 30                | 1.00         | 0.85               | 0.87          | 0.87           | 0.99           | 0.92 |
| 40                | 1.00         | 1.00               | 1.00          | 0.67           | 0.83           | 0.70 |
| 50                | 1.00         | 0.83               | 0.83          | 0.83           | 1.00           | 0.87 |
| 59                | 1.00         | 0.83               | 0.83          | 0.83           | 1.00           | 0.87 |

864

865

866
